# Supplementary material for: Electrokinetic characterization of synthetic protein nanoparticles
Source: publisher site journal article supplement (doi:10.3762/bjnano.11.138), 2020-10-13
Supplement: Additional file 1 [file 2190-4286-11-138-S1.pdf]

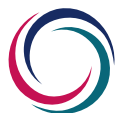

## Supporting Information

for

### **Electrokinetic characterization of synthetic protein nanoparticles**

Daniel F. Quevedo, Cody J. Lentz, Adriana Coll de Peña, Yazmin Hernandez, Nahal Habibi, Rikako Miki, Joerg Lahann and Blanca H. Lapizco-Encinas

*Beilstein J. Nanotechnol.* **2020**, *11*, 1556–1567. doi:10.3762/bjnano.11.138

### **Additional characterization information and device schematics**

## Electrokinetic microfluidic device

The schematic below (Figure S1) shows the detailed dimensions of the EK device used in this study.

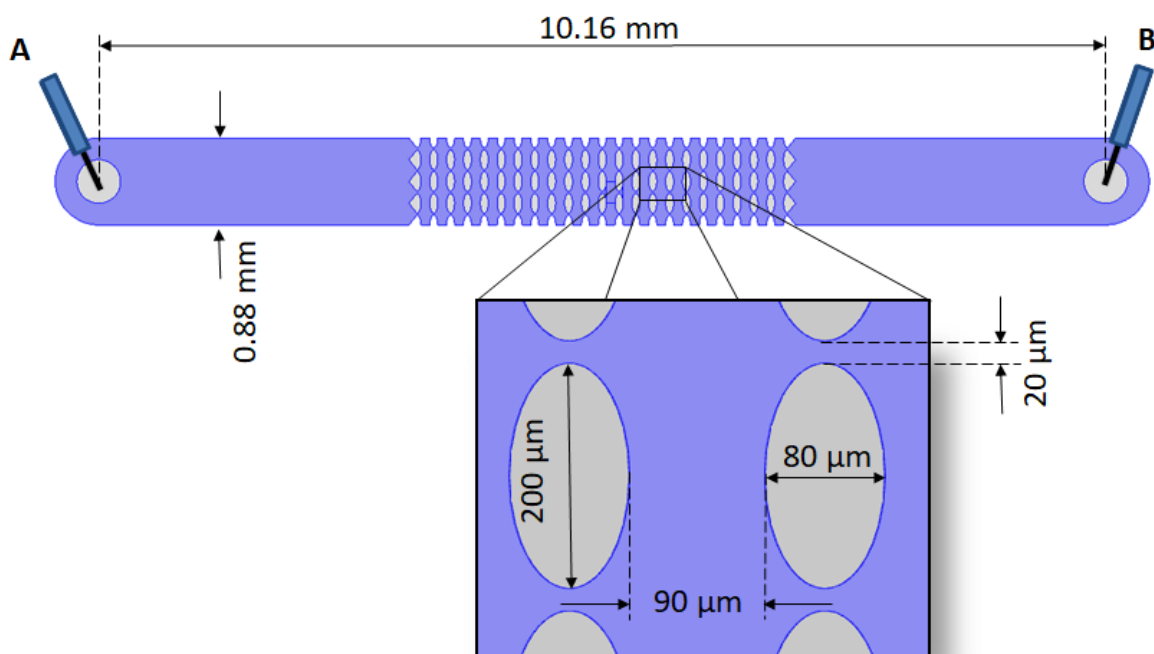

**Figure S1:** Schematic representation, with dimensions, of the iDEP device used in this study depicting the dimensions of the channels and the insulating posts.

## SPNP hydrodynamic diameter size distribution

The graph below depicts the size distribution of all SPNPs studied in this work.

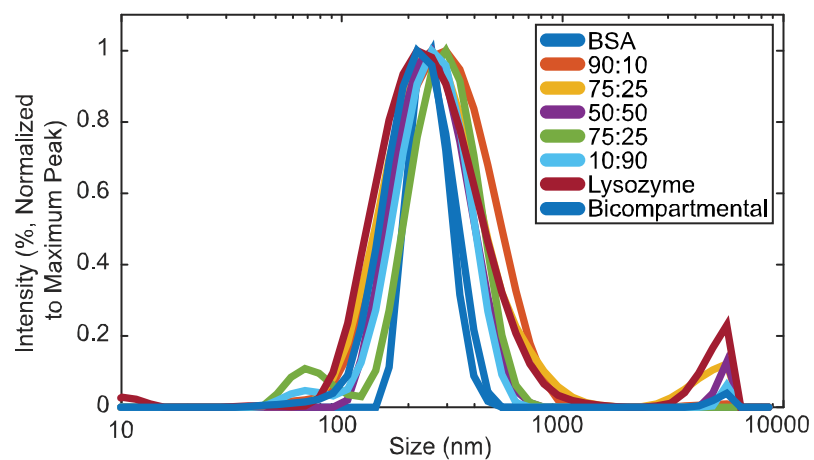

**Figure S2:** Plot of the size distribution curves of the SPNPs measured with dynamic light scattering.

### Trapping of SPNPs in EK microfluidic devices

Figure S3 shows representative images of all SPNPs being trapped in an EK microfluidic device. These images complement the results shown in Figure 4 of the main article.

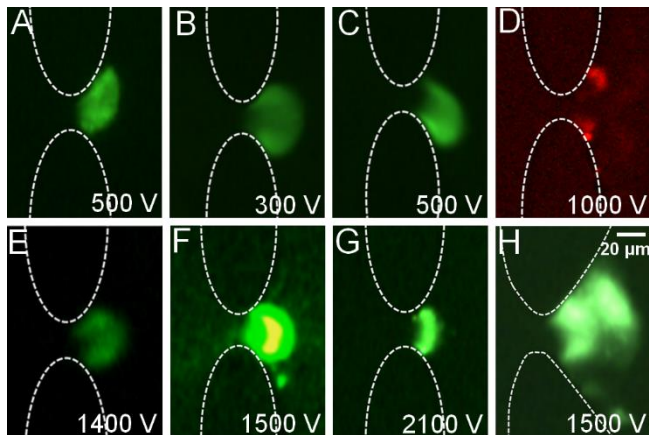

**Figure S3:** Images depicting the EK trapping of eight types of SPNPs used in this study.

### Scanning electron microscopy micrograph of anisotropic SPNPs

The image in Figure S4 shows an example of anisotropic SPNPs with one compartment made of BSA and the other one of lysozyme.

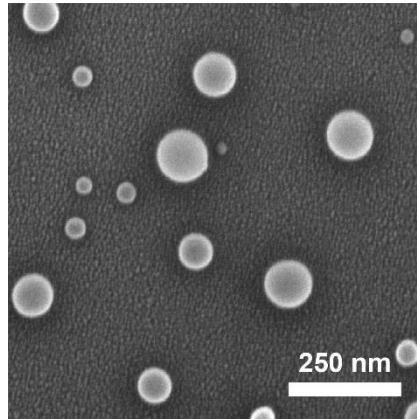

**Figure S4:** ASPNPs were identical to their single compartment counterparts when viewed using SEM.
